Just Published!

American Psychiatric Association Publishing

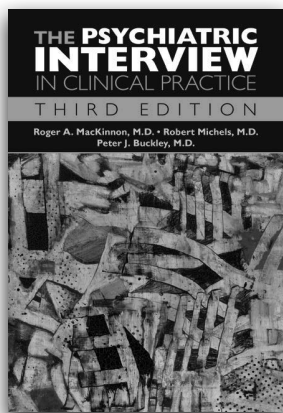

## The Psychiatric Interview in Clinical Practice, Third Edition

Roger A. MacKinnon, M.D., Robert Michels, M.D., and Peter J. Buckley, M.D.

It has been nearly a half-century since the inaugural edition of *The Psychiatric Interview in Clinical Practice*, and the book's status as a classic was again validated with the second edition a decade ago. This new, third edition maintains the book's reputation with thoroughly updated content that reflects changes brought about by the publication of DSM-5. The book presents the psychiatric interview in the context of the enormous and ongoing progress that has been made in biological and descriptive psychiatry. In addition, the book emphasizes the shift in the social

relationship between patient and clinician, recognizing that the therapeutic alliance has become the foundation of all medical treatment efforts and that patients are now better informed and seek active involvement in treatment decisions. The text reflects this growing equality and supports the clinician's efforts to nurture the relationship for optimum therapeutic outcomes. The chapter on the traumatized patient has been completely updated for this edition, and a chapter on the patient with dissociative identity disorder has been added.

*The Psychiatric Interview in Clinical Practice* will benefit mental health clinicians, both seasoned and in training, ensuring that their skills are current and their knowledge cutting-edge.

2016 • 704 pages • ISBN 978-1-61537-034-4 • Hardcover • \$79.00 • Item #37034

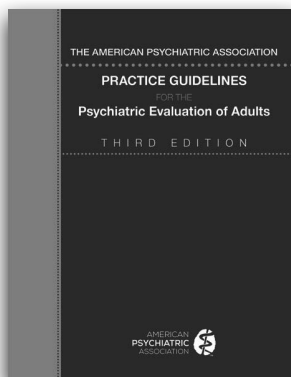

## The American Psychiatric Association Practice Guidelines for the Psychiatric Evaluation of Adults, Third Edition

American Psychiatric Association

This new edition of the practice guidelines on psychiatric evaluation for adults is the first set of the APA's guidelines developed under the new guideline development process. These guidelines address the following nine topics, in the context of an initial psychiatric evaluation: review of psychiatric symptoms, trauma history, and treatment history; substance use assessment; assessment of suicide risk; assessment for risk of aggressive behaviors;

assessment of cultural factors; assessment of medical health; quantitative assessment; involvement of the patient in treatment decision making; and documentation of the psychiatric evaluation. Each guideline recommends or suggests topics to include during an initial psychiatric evaluation. Findings from an expert opinion survey have also been taken into consideration in making recommendations or suggestions. In addition to reviewing the available evidence on psychiatry evaluation, each guideline also provides guidance to clinicians on implementing these recommendations to enhance patient care.

2016 • 170 pages • ISBN 978-0-89042-465-0 • Paperback • \$65.00 • Item #2465

2016 • 170 pages • ISBN 978-0-89042-675-3 • eBook • \$52.00 • Item #2675

Order Now

[www.appi.org](http://www.appi.org)

AMERICAN  
PSYCHIATRIC  
ASSOCIATION  
PUBLISHING

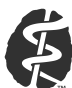

[www.appi.org](http://www.appi.org)

Email: [appi@psych.org](mailto:appi@psych.org)

Toll Free: 1-800-368-5777

20% Discount for American Psychiatric Association Members

25% Discount for APA Resident-Fellow Members

Please use Priority Code AH1553 when ordering. Find us on  and 

# The Gravity of Weight

## A Clinical Guide to Weight Loss and Maintenance

Sylvia R. Karasu, M.D., and T. Byram Karasu, M.D.

Foreword by Albert J. Stunkard, M.D.

***The Gravity of Weight: A Clinical Guide to Weight Loss and Maintenance***, is a scholarly and critical inquiry into the field of overweight and obesity. Reviewing more than 900 publications, from some of the early classical papers to the most recent research, the authors have integrated the complex psychological and physiological aspects of the mind, brain, and body to explain why the control of body weight is so daunting for so many people.

Written primarily for clinicians in all health-related fields, including physicians, psychologists, nurses, social workers, and nutritionists, as well as for their intellectually curious patients,

***The Gravity of Weight*** explores the controversy regarding obesity as a disease with morbidity and mortality, as well as the complex methodological issues involved in obesity research. The authors delineate the extraordinary metabolic complexities implicated in weight control as well as the importance of circadian rhythms and sleep as they relate to weight and even disorders such as the night eating syndrome. They also investigate the psychological aspects of overweight and obesity, including discrimination against the obese and the fat acceptance movement, and they discuss some of the most common diets as well as the psychotherapeutic, pharmacological, and surgical treatment options currently available for these patients.

Drs. Karasu have drawn from both professional and personal experience to write ***The Gravity of Weight: A Clinical Guide To Weight Loss and Maintenance***. Both had fathers who suffered from morbid obesity. One died at the age of 56, while the other lived to be 91. The authors' professional curiosity led them to question how differences in environment, genetics, and overall physical and psychological health can affect one person's longevity and another's early passing.

In searching for the answers to some of the most perplexing questions regarding weight, the authors have created what is perhaps the most comprehensive exploration of the relationship of the mind, brain, body and our environment to overweight and obesity. The resulting text deserves a prominent place in the library of those who work in this field.

**2010 • 518 pages • ISBN 978-1-58562-360-0 • Paperback • \$66.00 • Item #62360**

AMERICAN  
PSYCHIATRIC  
ASSOCIATION  
PUBLISHING

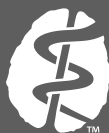

www.appi.org • Email: appi@psych.org • Phone: 1-800-368-5777

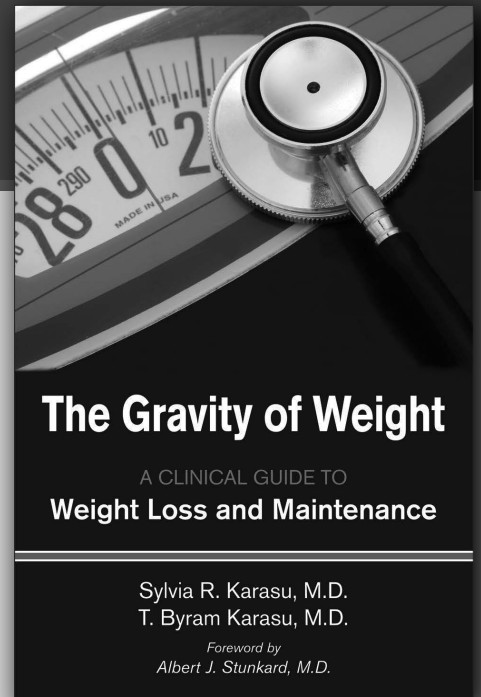

### The Gravity of Weight

A CLINICAL GUIDE TO  
**Weight Loss and Maintenance**

Sylvia R. Karasu, M.D.

T. Byram Karasu, M.D.

Foreword by

Albert J. Stunkard, M.D.

**20%** Discount for American Psychiatric Association Members!

**25%** Discount for APA Resident-Fellow Members

AH1530A

# Understanding Mental Disorders

## Your Guide to DSM-5®

American Psychiatric Association

**A consumer guide for anyone who has been touched by mental illness!**

**Understanding Mental Disorders: Your Guide to DSM-5®** is a vital resource for anyone who has been touched by mental illness.

Most of us know someone who suffers from a mental illness. This book helps those who may be struggling with mental health problems, as well as those who want to help others achieve mental health and well-being.

Based on the latest, fifth edition of the *Diagnostic and Statistical Manual of Mental Disorders*—known as DSM-5®—**Understanding Mental Disorders** provides valuable insight on what to expect from an illness and its treatment—and will help readers recognize symptoms, know when to seek help, and get the right care. Featured disorders include depression, schizophrenia, ADHD, autism spectrum disorder, posttraumatic stress disorder, and bipolar disorder, among others.

The common language for diagnosing mental illness used in DSM-5® for mental health professionals has been adapted into clear, concise descriptions of disorders for nonexperts.

In addition to specific symptoms for each disorder, readers will find:

- Risk factors and warning signs
- Related disorders
- Ways to cope
- Tips to promote mental health
- Personal stories
- Key points about the disorders and treatment options
- A special chapter dedicated to treatment essentials and ways to get help
- Helpful resources that include a glossary, list of medications and support groups

For more resources and information, go to [www.psychiatry.org/UnderstandingMentalDisorders](http://www.psychiatry.org/UnderstandingMentalDisorders)

2015 • 370 pages • ISBN 978-1-58562-491-1 • Paperback • \$24.95 • Item #62491

AMERICAN  
PSYCHIATRIC  
ASSOCIATION  
PUBLISHING

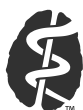

Order Online: [www.appi.org](http://www.appi.org)

Phone: 703-907-7322 • Toll Free: 1-800-368-5777

Email: [appi@psych.org](mailto:appi@psych.org)

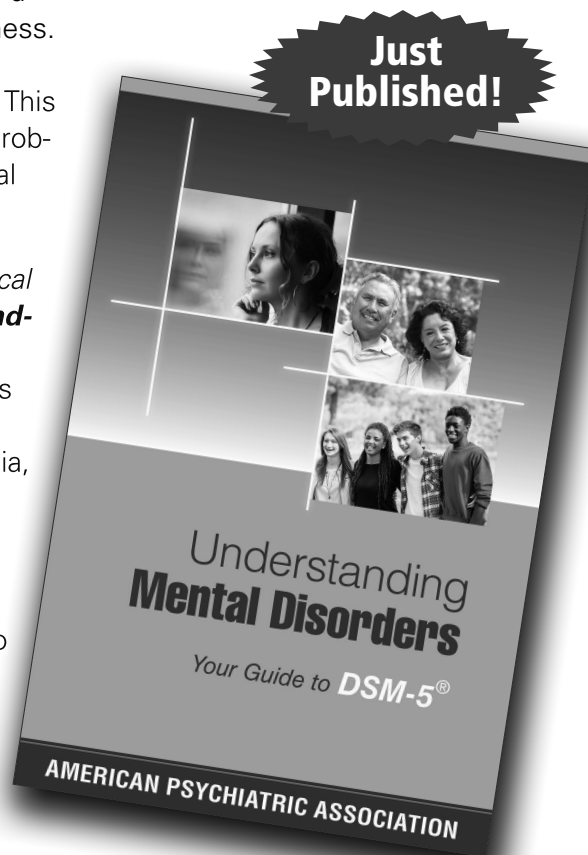

With Foreword by  
Patrick J. Kennedy

20% Discount for American Psychiatric  
Association Members

25% Discount for APA Resident-Fellow Members AH1512R

**Psychiatric Services** (ISSN 1075-2730; online version, 1557-9700) is published monthly by the American Psychiatric Association, editorial and executive office, 1000 Wilson Blvd., Suite 1825, Arlington, VA 22209-3901. Copyright © 2016 by the American Psychiatric Association. Printed in U.S.A. Periodicals postage paid at Arlington, VA, and at additional mailing offices. POSTMASTER: Send address changes to **Psychiatric Services, 1000 Wilson Blvd., Suite 1825, Arlington, VA 22209-3901.**

## UNMATCHED GROWTH OPPORTUNITIES

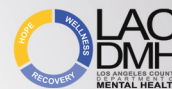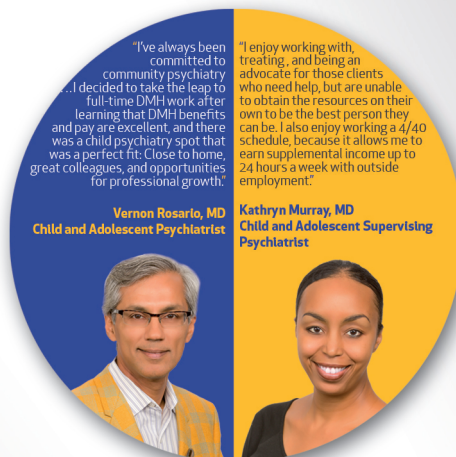

The Los Angeles County Department of Mental Health has immediate openings with Jail Mental Health Services, Juvenile Justice Correctional Facilities, Antelope Valley, and directly operated programs. This is your chance to join the leading mental health agency in the nation and work in a safe, diverse, and challenging environment. Our entire department is filled with opportunities for professional development and growth, and is expanding exponentially with 27 new full-time psychiatrist positions. We offer competitive salaries with potential bonuses up to \$30,000\* a year, depending on qualifications and placement, plus up to 24 hours a week is allowed for outside employment.

\*Based on CEO approval at step 15 of the mental health psychiatrist salary schedule.

[www.psychiatristjobs.la](http://www.psychiatristjobs.la)

## There's So Much More to PSYCHIATRIC SERVICES Than Meets the Page!

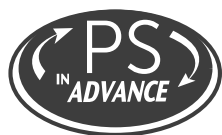

### Psychiatric Services in Advance

Latest research reports!

#### College Mental Health and Collaborative Campus Communities

This review outlines practical steps for implementing best practices for the psychiatric care of college students. At the center of these practices is use of a collaborative team and psychoeducation to engage students in treatment.

#### Factors in Escalation to High-Dose Benzodiazepine Use

About 8% of a large cohort of sustained users of benzodiazepines escalated to high doses. Younger age, urban residence, low income, a depression diagnosis, and use of antidepressants appeared to contribute to dose escalation.

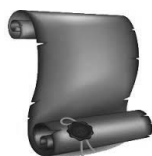

Revisit the field's rich history!

#### 50 Years Ago in Psychiatric Services

- Instant Therapy in a State Hospital Ward
- Treating the Social Symptoms of Mental Illness
- Extending Community Visits for Long-Term Patients

AMERICAN  
PSYCHIATRIC  
ASSOCIATION  
PUBLISHING

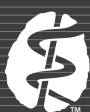

[ps.psychiatryonline.org](http://ps.psychiatryonline.org)

[www.appi.org](http://www.appi.org) • 1-800-368-5777 • Fax: 703-907-1091 • Email: [appi@psych.org](mailto:appi@psych.org)

Priority Code AH1520

# The DSM-5 Collection

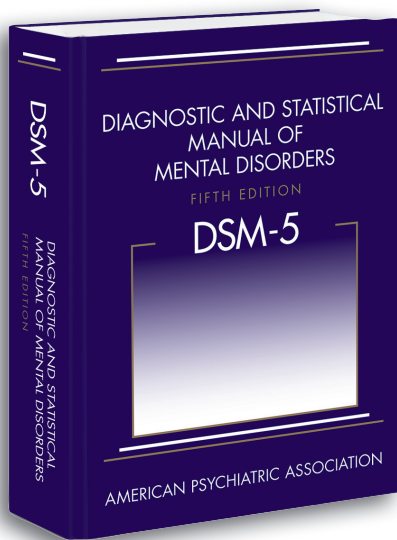

## Diagnostic and Statistical Manual of Mental Disorders, Fifth Edition (DSM-5®)

American Psychiatric Association

This new edition of *Diagnostic and Statistical Manual of Mental Disorders* (DSM-5®), used by clinicians and researchers to diagnose and classify mental disorders, is the product of more than 10 years of effort by hundreds of international experts in all aspects of mental health. Their dedication and hard work have yielded an authoritative volume that defines and classifies mental disorders in order to improve diagnosis, treatment, and research.

The criteria are concise and explicit, intended to facilitate an objective assessment of symptom presentations in a variety of clinical settings—inpatient, outpatient, partial hospital, consultation-liaison, clinical, private practice, and primary care.

- The latest findings in neuroimaging and genetics have been integrated into each disorder along with gender and cultural considerations.
- The revised organizational structure recognizes symptoms that span multiple diagnostic categories, providing new clinical insights in diagnosis.

- Both ICD-9-CM and ICD-10-CM codes are included for each disorder.

The *Diagnostic and Statistical Manual of Mental Disorders*, Fifth Edition, is the most comprehensive, current, and critical resource for clinical practice available to today's mental health professionals.

2013 • 991 pages • ISBN 978-0-89042-554-1 • Hardcover • \$205.00 • Item #2554

2013 • 991 pages • ISBN 978-0-89042-555-8 • Paperback • \$155.00 • Item #2555

2013 • 991 pages • ISBN 978-0-89042-557-2 • eBook • \$124.00 • Item #2557

**DSM-5**  
COLLECTION

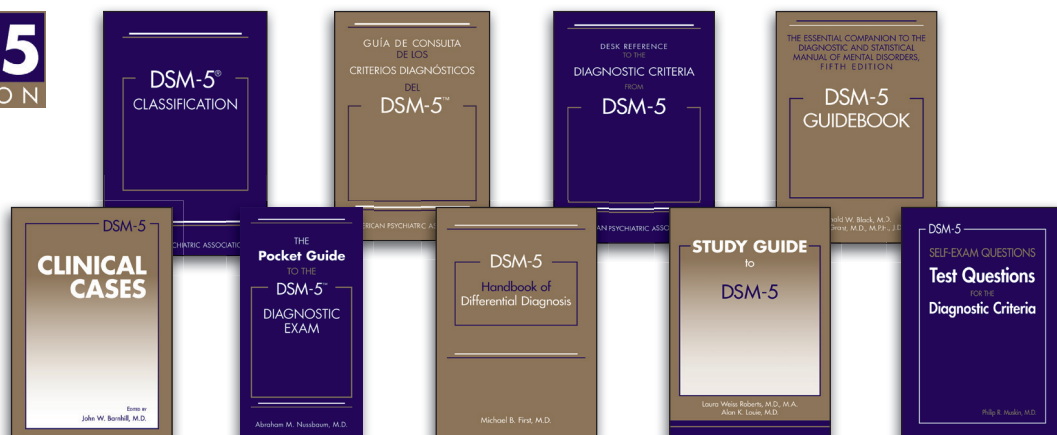

AMERICAN  
PSYCHIATRIC  
ASSOCIATION  
PUBLISHING

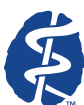

Order Online: [www.appi.org](http://www.appi.org)  
Phone: 703-907-7322  
Toll Free: 1-800-368-5777  
Email: [appi@psych.org](mailto:appi@psych.org)

20% Discount for American Psychiatric  
Association Members

25% Discount for APA Resident-Fellow Members AH1552A
