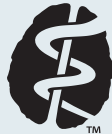

# Psychiatric Services

A Journal of the American Psychiatric Association

*Psychiatric Services*, established in 1950, is published monthly by the American Psychiatric Association for mental health professionals and others concerned with treatment and services for persons with mental illnesses and mental disabilities, in keeping with APA's objectives to improve care and treatment, to promote research and professional education in psychiatric and related fields, and to advance the standards of all psychiatric services and facilities.

## Editor

Howard H. Goldman, M.D., Ph.D.

## Editorial Board

Regina Bussing, M.D., M.S.H.S.  
Javier I. Escobar, M.D.  
Stephen M. Goldfinger, M.D.  
Richard K. Harding, M.D.  
Marcela Horvitz-Lennon, M.D., M.P.H.  
Sheryl H. Kataoka, M.D.  
Roberto Lewis-Fernández, M.D.  
Ramin Mojtabei, M.D., Ph.D.  
Mark R. Munetz, M.D.  
Martha Sajatovic, M.D.  
Gregory E. Simon, M.D., M.P.H.  
T. Scott Stroup, M.D., M.P.H.

## Editor Emeritus

John A. Talbott, M.D.

## Book Review Editor

Jeffrey L. Geller, M.D., M.P.H.

## Contributing Editors

Paul S. Appelbaum, M.D., *Law & Psychiatry*  
José Miguel Caldas de Almeida, M.D.,  
and Matt Muijen, M.D., Ph.D.,  
*Global Mental Health Reforms*  
Francine Cournos, M.D., and Stephen  
M. Goldfinger, M.D., *Frontline Reports*  
Lisa B. Dixon, M.D., M.P.H., and Brian  
Hepburn, M.D., *Research and Services  
Partnerships*  
Benjamin G. Druss, M.D., M.P.H.,  
*Integrated Care*  
Jeffrey L. Geller, M.D., M.P.H.,  
*Personal Accounts*  
Marcela Horvitz-Lennon, M.D., M.P.H.,  
*Best Practices*  
Amy M. Kilbourne, Ph.D., M.P.H., and  
Tami L. Mark, Ph.D., *Datapoints*  
Fred C. Osher, M.D., and Marvin S.  
Swartz, M.D., *State Mental Health Policy*  
Jules M. Ranz, M.D., Susan M.  
Deakins, M.D., and Stephanie  
Le Melle, M.D., *Case Studies in  
Public-Sector Leadership*  
Steven S. Sharfstein, M.D., Haiden A.  
Huskamp, Ph.D., and Alison Evans  
Cuellar, Ph.D., *Economic Grand  
Rounds*

## Statistical Consultant

Deborah R. Medoff, Ph.D.

## Editorial Consultants

Joseph M. Cerimele, M.D.  
Julie M. Donohue, Ph.D.  
Robert E. Drake, M.D., Ph.D.  
M. Susan Ridgely, J.D.  
Laura Van Tosh

## Editorial Staff

Constance Grant Gartner  
*Managing Editor*  
Demarie S. Jackson  
*Associate Editor*  
Kathleen Stearman  
*Associate Editor*  
Wendy Lieberman Taylor  
*Production Manager*  
Heidi A. Koch  
*Editorial Support Services Manager*

## Publisher

Rebecca D. Rinehart

## American Psychiatric Association

Renée L. Binder, M.D., *President*  
Maria A. Oquendo, M.D., *President-Elect*  
Glenn Martin, M.D., *Speaker,  
APA Assembly*  
Saul Levin, M.D., M.P.A., *Chief Executive  
Officer and Medical Director*

## Mailing Address

Psychiatric Services  
American Psychiatric Association  
1000 Wilson Blvd., Suite 1825  
Arlington, VA 22209-3901

## Editorial Office

Phone: 703-907-7885  
E-mail: [psjournal@psych.org](mailto:psjournal@psych.org)
