# Psychiatric Services

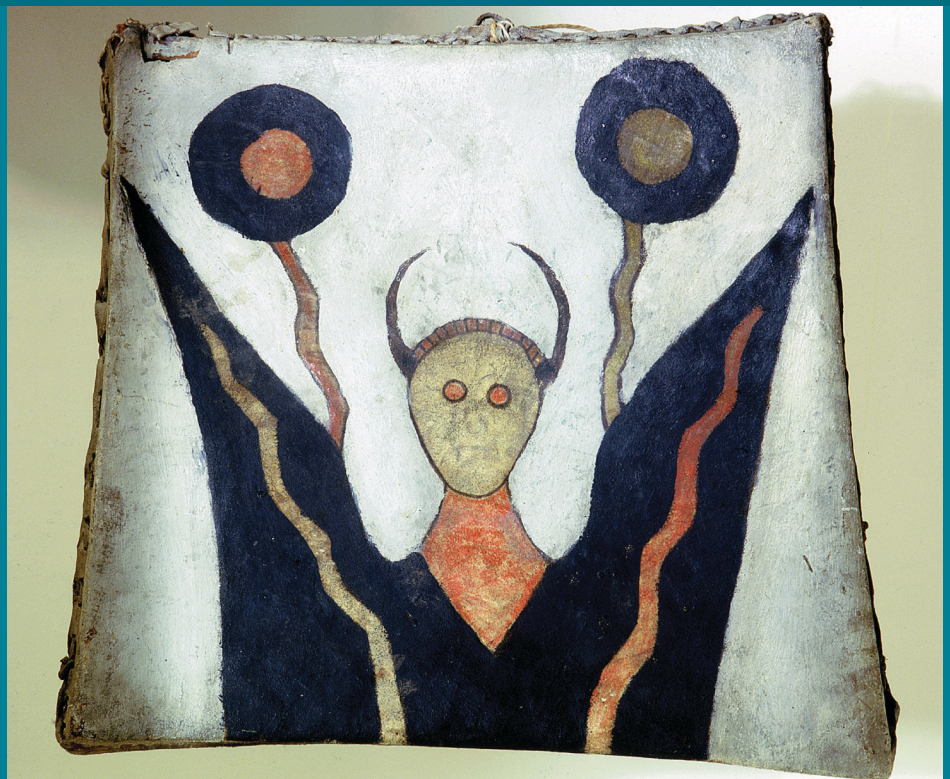

Interventions to improve engagement in services: a literature review

Use of data and EBPs by state behavioral health systems, 2001–2012

How technology is transforming service delivery: three studies

Does the PHQ-9 suicidal ideation item predict suicide among veterans?
